# Supplementary material for: An electrochemical microsensor of the SARS-CoV-2 nucleocapsid protein based on a surface-imprinted acupuncture needle
Source: Royal Society of Chemistry journal article supplement (doi:10.1039/d4an01497a), 2025-01-01
Supplement: d4an01497a1.pdf [file d4an01497a1.pdf]

## Supporting Information

### An electrochemical microsensor of the SARS-CoV-2 nucleocapsid protein based on surface-imprinted acupuncture needle

Yan Liu<sup>a, b</sup>, Xue Kong<sup>b</sup>, Yi Zhang<sup>b</sup>, Xiumei Zhou<sup>a, \*</sup>, Zheng-Zhi Yin<sup>a, b, \*</sup>

<sup>a</sup> College of Life Sciences and Medicine, Zhejiang Sci-Tech University, Hangzhou, 310018, China

<sup>b</sup> Jiaxing Key Laboratory of Molecular Recognition and Sensing, College of Biological, Chemical Sciences and Engineering, Jiaxing University, Jiaxing 314001, China

**\* Corresponding author:**

E-mail: zhouxiumei824@163.com (X.-M. Zhou); yinzhengzhi@zjxu.edu.cn (Z.-Z. Yin)

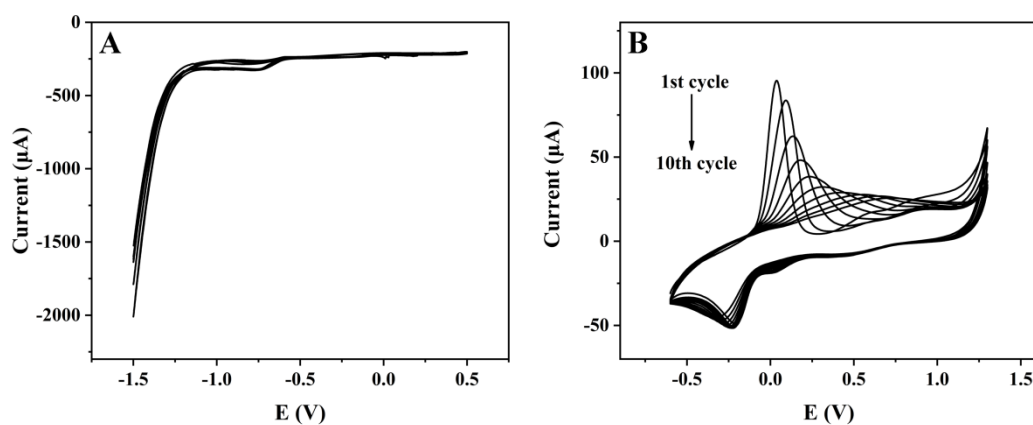

**Fig. S1** CV of electrodeposition of AuNPs on the surface of ANME (A) and electropolymerization of MB on the surface of the ANME/AuNPs/MPBA/SARS-CoV-2-N protein (B).
